# Supplementary material
Source: publisher figshare collection journal article supplement (https://asha.figshare.com/ndownloader/files/36114413)
Supplement: Supplementary file 1 [file 36114413]

**Supplemental Material S1.** Critical appraisal of included studies of SCERTS using quality indicators.

|                        | <b>RCT</b>      | <b>Attrition bias: low/unclear/high</b> | <b>Detection bias: low/unclear/high</b> | <b>Parent/teacher report: low/high</b> | <b>CME: no/yes</b> | <b>GC/PCB/CB</b> | <b>Dis/Prox</b> | <b>Ratio of low ratings</b> |
|------------------------|-----------------|-----------------------------------------|-----------------------------------------|----------------------------------------|--------------------|------------------|-----------------|-----------------------------|
| Flaz & Rehman (2020)   | 0 (2 outcomes)  | 0/2/0                                   | 0/2/0                                   | 2/0                                    | 2/0                | 0/0/2            | 0/2             | 28.6%                       |
| Kim (2021)             | 0 (4 outcomes)  | 0/4/0                                   | 0/0/4                                   | 3/1                                    | 4/0                | 4/0/0            | 2/2             | 46.4%                       |
| Morgan et al. (2018)   | 1 (13 outcomes) | 13/0/0                                  | 2/0/11                                  | 4/9                                    | 6/7                | 6/5/2            | 13/0            | 62.6%                       |
| Suh (2019)             | 0 (6 outcomes)  | 6/0/0                                   | 0/0/6                                   | 6/0                                    | 6/0                | 6/0/0            | 0/6             | 57.1%                       |
| Wetherby et al. (2014) | 1 (15 outcomes) | 15/0/0                                  | 10/0/5                                  | 10/5                                   | 10/5               | 10/5/0           | 15/0            | 81.0%                       |
| Yu & Zhu (2018)        | 0 (15 outcomes) | 15/0/0                                  | 12/0/3                                  | 12/3                                   | 15/0               | 15/0/0           | 13/2            | 78.1%                       |

*Note.* CB = Context-bound; CME = Correlated measurement error; Dis = Distality; GC = Generalized characteristics; RCT = Randomized controlled trial.

## References

- Flaz, H., & Rehman, A. U. (2020). Effectiveness of the social communication emotional regulation and transactional support (SCERTS) model based intervention in language development and fostering social communication in children with autism spectrum disorder. *Journal of Fatima Jinnah Medical University*, 14(1), 16–18. <https://doi.org/10.37018/IENH3595>
- Kim, S. (2021). *A study on the influence of SCERTS-social communication applied multifaceted communication program on the early communication of children with autism spectrum disorder* [Master's thesis, Daegu University]. RISS.
- Morgan, L., Hooker, J. L., Sparapani, N., Reinhardt, V. P., Schatschneider, C., & Wetherby, A. M. (2018). Cluster randomized trial of the classroom SCERTS intervention for elementary students with autism spectrum disorder. *Journal of Consulting and Clinical Psychology*, 86(7), 631–644. <https://doi.org/10.1037/ccp0000314>
- Suh, M. (2019). *Effectiveness of a caregiver-implemented SCERTS model-based intervention for toddlers with autism spectrum disorders (ASD)* [Doctoral dissertation, Ewha Womans University]. RISS.
- Wetherby, A. M., Guthrie, W., Woods, J., Schatschneider, C., Holland, R. D., Morgan, L., & Lord, C. (2014). Caregiver-implemented social intervention for toddlers with autism: An RCT. *Pediatrics*, 134(6), 1084–1093. <https://doi.org/10.1542/peds.2014-0757>
- Yu, L., & Zhu, X. (2018). Effectiveness of a SCERTS model-based intervention for children with autism spectrum disorder (ASD) in Hong Kong: A pilot study. *Journal of Autism and Developmental Disorders*, 48(11), 3794–3807. <https://doi.org/10.1007/s10803-018-3849-6>
